# Supplementary material
Source: PubMed Central journal article supplement (PMC7731793)
Supplement: bloodBLD2019002782-suppl1.pdf [file bloodBLD2019002782-suppl1.pdf]

# Supplemental data

Supplemental methods  
Supplemental references  
Supplemental figures 1-5  
Supplemental tables 1-3

## **Supplemental Methods**

### **Acquisition of tissues from human organ donors**

Human tissues were obtained from deceased organ donors at the time of organ acquisition for clinical transplantation as previously described, and through an approved research protocol and MTA with LiveOnNY, the organ procurement organization for the New York metropolitan area. The information on donors used in this study is presented in Supplemental Table 1. All donors were previously healthy, were free of cancer, and were serologically negative for Hepatitis B, C, and HIV. Isolation of tissues from organ donors does not qualify as “human subjects” research, as confirmed by the Columbia University IRB.

### **Flow cytometric analysis of cryopreserved samples**

Cryopreserved cells of spleen, blood, bone marrow or intestinal tissue were thawed at 37°C and instantly passed through a 70µm cell strainer into RPMI medium containing 10% FCS. After centrifugation cells were resuspended in HBSS +Ca/+Mg, containing 45U/ml DNaseI (Sigma) and 2% FCS. The reaction was stopped by adding 4mM EDTA to the cells. 3-4x10<sup>6</sup> cells per 1.2ml-microtube were stained in a volume of 200µl HBSS -Ca/-Mg with 3% FCS and 2mM EDTA (referred to as staining buffer (SB)). All antibodies and staining reagents used in this study are listed in Supplemental Tables 2 and 3. For the experiments described in figures 1 and 2 all 33 spleen samples were stained with “Stain 1” (Supplemental Table 2). Fixable viability stain (FVS) 510 (Beckton Dickinson) or Ghost 510 (Tonbo Biosciences) were used in a separate step for 15

minutes at room temperature to exclude dead cells. The blood cells of 16 donors, bone marrow cells from 16 donors and intestinal cells of 11 donors were stained with the same 10-color flow panel, 2 additional blood and 6 intestinal tissue samples were stained with “Stain 2”. For latter flow panel FVS700 (Beckton Dickinson) was used to exclude dead cells. For all panels the antibody staining was performed for 40 min on ice in the dark. To detect biotinylated antibodies, after washing, an incubation with Streptavidin-BUV737 for 15 minutes on ice was performed. Cells were then fixed in 1% PFA for 30min before analysis on a BD LSRII. Data analysis was performed in FlowJo v.9 (Treestar). For the experiment described in supplemental figure 3 a total of 9x spleen, 8x blood and 7x intestinal tissue cells were stained with “Stain 4”. For this panel ZombieNIR was used to exclude dead cells. After fixation in 1% PFA cells were analysed on the Cytex Aurora and data analysis performed in FlowJo v.10 (Treestar).

#### **Functional analysis of CD45RB/ CD69 subsets in spleen.**

Cryopreserved cells were thawed as previously described and stained with CD19-APC-Vio770, CD27-BUV737, CD45RB-FITC and CD69-BV510 (Supplemental Table 3) for 40min on ice in the dark. For exclusion of dead cells 7-AAD was added to the samples right before FACS-sorting on an BD ARIALL. Defined CD45RB/ CD69 subsets from CD19<sup>+</sup> CD27<sup>-</sup> (naïve) and CD19<sup>+</sup> CD27<sup>+</sup> (memory) B cells were individually sorted into 1ml RPMI 1640 (Corning), containing 10% heat-inactivated FBS (Gemini), 1x Penicillin/ Streptomycin, 10mM HEPES, 2mM L-Glutamin (all Gibco) and 0.05mM  $\beta$ -Mercaptoethanol (Sigma) (in future referred to as R10). After sorting centrifugation and counting of the cells was performed and equal cell numbers of the different CD45RB/

CD69 subsets seeded into 96-well plates in a volume of 100µl R10 each. Cells were stimulated with 1µg/ml ODN2006 (5'-tcgtcgttttgctggtttgctggtt-3') by adding 100µl 2x ODN2006 prepared in R10 and incubated at 37°C and 5% CO<sub>2</sub>. Cells were harvested on day 5 and divided into flow cytometrical analysis and ELISpot assay. Cells were pipetted up and down in wells and transferred to a 1.2ml microtube, volume was measured and half of it transferred to a second 1.2ml microtube. After centrifugation one tube was resuspended in 200µl SB containing antibodies CD86-PE, CD25-PE-Dazzle594, CD38-BUV395, IgM-PE-Cy5, CD19-APC-Vio770 and CD27-BUV737 (Supplemental Table 3) for flow cytometric analysis. Staining was performed for 40min on ice in the dark. For live/ dead exclusion fixable viability stain FVS700 (BD) was used for 15min at room temperature. Cells were then fixed in 1% PFA for 30min before analysis on a BD LSRII. Data analysis was performed in FlowJo v.9 software (Treestar). The second tube was resuspended in R10 medium and used for ELISpot assay.

Statistical analysis of functional data: In each case, we compared the 5 cell populations (naïve DN, CD45SP, 45/ 69 DP, 45/ 69 DN, CD69SP) in a pairwise fashion (i.e., a total of 10 comparisons). For each pairwise comparison, we first calculated a P value using a paired t-test. We then computed corresponding q values by adjusting the P values for multiple comparisons using a Bonferroni correction. Using a paired test accounts for different donor-specific baselines and evaluates whether there is a difference between the different cell populations after accounting for these differential baselines (i.e., looks at donor-specific relative changes).

## **ELISpot assay**

After coating 4-HBX plates overnight at 4°C with 5µg/ml anti-human lambda and kappa (Southern Biotech) each in 1xPBS, they were washed three times with PBS/ 0,05% Tween20 followed by two times with distilled water. Wells were blocked with 200µl 1xPBS/ 5% heat-inactivated FBS for 2h at room temperature or overnight at 4°C. Afterwards they were washed twice with distilled water and 200µl R10 were added to each well. Plates were incubated at 37°C until plating cells. Cells were harvested as described above and 100µl cells per well added to row A for according sample. Duplicates for IgG and IgM were diluted in a 1:3 series by transferring 100µl to next row with multichannel pipet. Last row of each plate didn't receive cells and is considered blank. After a short spin cells were incubated at 37°C and 5% CO<sub>2</sub> for 5h. After another washing step with PBS/ Tween and distilled water 50µl secondary antibody anti-human IgG-AP or anti-human IgM-AP (both Sigma) were added to each well. Plates were incubated overnight at 4°C. Another washing cycle was followed by developing the plates. Therefore BCIP in solution was mixed with 3% low-melt agarose and 40µl added per well. Plates were cooled down for 60min at room temperature and developed overnight at 4°C flipped upside down. Within 24h spots were counted and used for analysis.

## **RNA sequencing**

Cryopreserved cells of spleen and ileum were thawed and stained with CD19-APC-Vio770, CD27-BV421, CD45RB-FITC and CD69-BV510 (Supplemental Table 3). For exclusion of dead cells 7-AAD was added to the samples right before FACS-sorting on

an BD ArialI. Defined CD45RB/ CD69 subsets from CD19<sup>+</sup> CD27<sup>-</sup> (naïve) and CD19<sup>+</sup> CD27<sup>+</sup> (memory) B cells were individually sorted into RNA-protect<sup>®</sup> Cell Reagent (Qiagen 76526), washed with PBS and resuspended in RLT-buffer (Qiagen) containing 1%  $\beta$ -ME. After running through a shredder-column (Qiagen QIAshredder 79656) samples were frozen as RLT lysates at -80°C until RNA was isolated using RNAeasy micro or mini kits (Qiagen). Libraries were prepared using the Illumina TruSeq Total RNA kit with ribosomal depletion or the SMART-Seq v4 Ultra Low Input RNA Kit for sequencing and Illumina Nextera XT DNA Library preparation kit following the manufacturer's protocol. Cluster generation and 75 bp Paired-read dual-indexed sequencing was performed on Illumina NextSeq 500 at the Health Sciences Sequencing Core in Pittsburgh or on a HiSeq 2500 sequencer at the Sulzberger Genome Center in NY. RNA-seq data uploaded to GEO (accession code GSE154583).

### **RNA sequencing analysis**

Reads were mapped to the human reference genome build hg19 using STAR <sup>46</sup> (version 2.3.0e) with default parameters. FeatureCounts <sup>47</sup> was used to compute the number of reads mapped to each gene with options “-s 0 -t exon -g gene\_name”.

Downstream statistical analysis was performed with R programming language. DESeq2 <sup>48</sup> was used for differential gene expression analysis, using batch and donor information as covariates to control confounding effects. Genes were considered as significantly differentially expressed between two groups if  $FDR \leq 0.05$  and absolute value of  $\log_2$  fold change  $> 1$ . For heatmap visualization, gene read counts were first normalized with DESeq2 <sup>48</sup> for library depth, and then sequencing batch effect and donor difference

effect removed with function ComBat in the sva <sup>49</sup> package. Principal component analysis (PCA) was performed using function *prcomp* in R, with centering, scaling, and cor options on. Heatmaps were plotted with Z-score of log base 10 normalized read counts across samples as input with the *pheatmap* package.

For GSEA analysis in Supplemental Figure 4, plasmablast gene signatures are the top 200 genes ordered by log fold change from GenomicScape

(<http://www.genomicscape.com/microarray/nbtopc.php>) and plasma cell signatures were from ref. <sup>50</sup>. Statistical analysis is described in the figure legend.

#### **Supplemental references:**

46. A. Dobin, C. A. Davis, F. Schlesinger, J. Drenkow, C. Zaleski, S. Jha, P. Batut, M. Chaisson, and T. R. Gingeras. STAR: ultrafast universal RNA-seq aligner. *Bioinformatics (Oxford, England)* **29** (1), 15-21 (2013).
47. Y. Liao, G. K. Smyth, and W. Shi. featureCounts: an efficient general purpose program for assigning sequence reads to genomic features. *Bioinformatics (Oxford, England)* **30** (7), 923-30 (2014).
48. M. I. Love, W. Huber, and S. Anders. Moderated estimation of fold change and dispersion for RNA-seq data with DESeq2. *Genome biology* **15** (12), 550 (2014).
49. J. T. Leek, W. E. Johnson, H. S. Parker, A. E. Jaffe, and J. D. Storey. The sva package for removing batch effects and other unwanted variation in high-throughput experiments. *Bioinformatics (Oxford, England)* **28** (6), 882-3 (2012).
50. L. M. Valor, B. Rodríguez-Bayona, A. B. Ramos-Amaya, J. A. Brieva, and A. Campos-Caro. The transcriptional profiling of human in vivo-generated plasma cells identifies selective imbalances in monoclonal gammopathies. *PLoS ONE* **12** (8), e0183264 (2017).

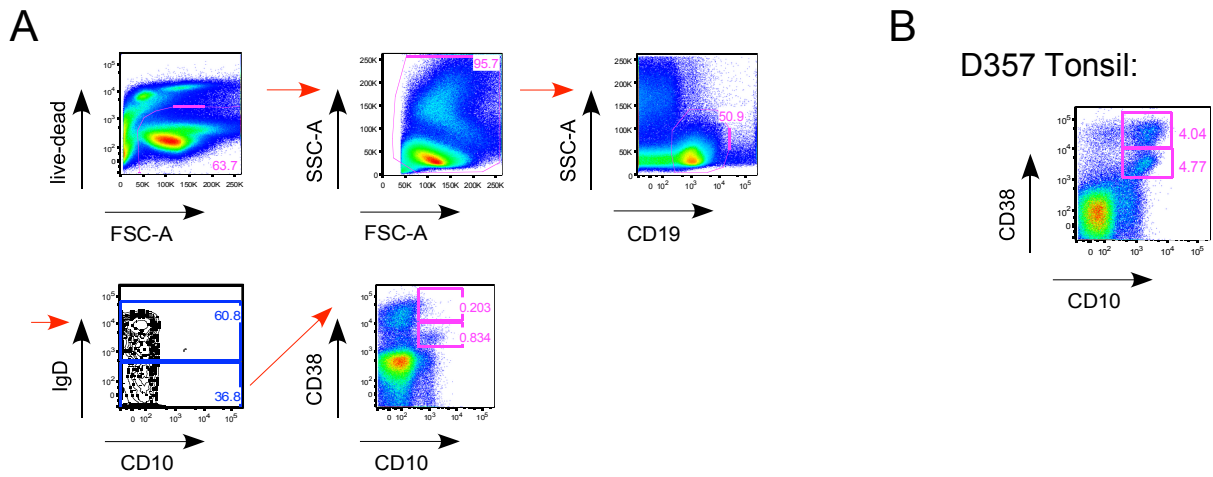

**Supplemental Figure 1: Gating strategy for germinal center B cells in tissues.** (A) Gating strategy modified from Milpied et al. used for flow cytometric analysis using the 10color-screening panel “Stain 1” for detection of germinal center B cells within splenocytes of D230. Arrows indicate subsequent gating of populations and numbers next to outlined areas indicate percent gated populations. Analyzed were live singlets which are CD19<sup>+</sup>, IgD<sup>-</sup>, CD10<sup>+</sup>, and either CD38<sup>int</sup> (0.834%) or CD38<sup>hi</sup> (0.203%). (B) Gated as (A) from tonsil of donor D357 as positive control.



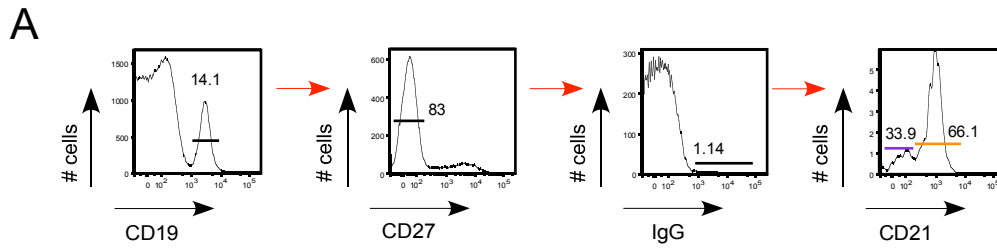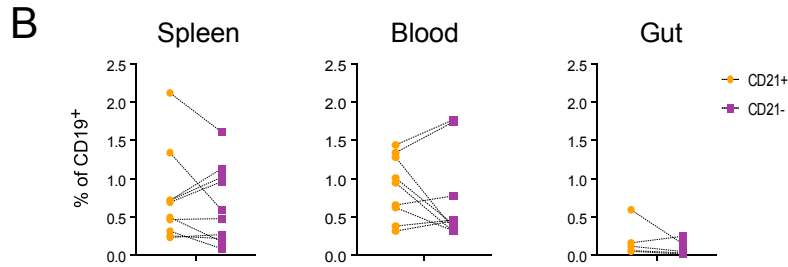

**Supplemental Figure 2: Gating strategy for atypical MBC in tissues.** (A) Gating strategy used for flow cytometric analysis of panel "Stain 2" (Supplemental Tables 2 & 3) for detection of atypical MBC in blood of D260 as example. Arrows indicate subsequent gating of populations and numbers next to outlined areas are percent gated populations. Analyzed were all live, single cells (see gating in Supplemental Figure 1) that are CD19<sup>+</sup>, CD27<sup>-</sup>, IgG<sup>+</sup>, and either CD21<sup>-</sup> (33.9%; atypical MBC) or CD21<sup>+</sup> (66.1%). (B) Following the gating strategy in (A), a total of 10x spleen, 9x blood and 4x intestinal tissue samples were analyzed. The frequencies of CD21<sup>+</sup> (orange circles) and CD21<sup>-</sup> (purple squares) cells are shown as percentage of live CD19<sup>+</sup>/CD27<sup>-</sup>/IgG<sup>+</sup> with lines linking individual samples.

**A**

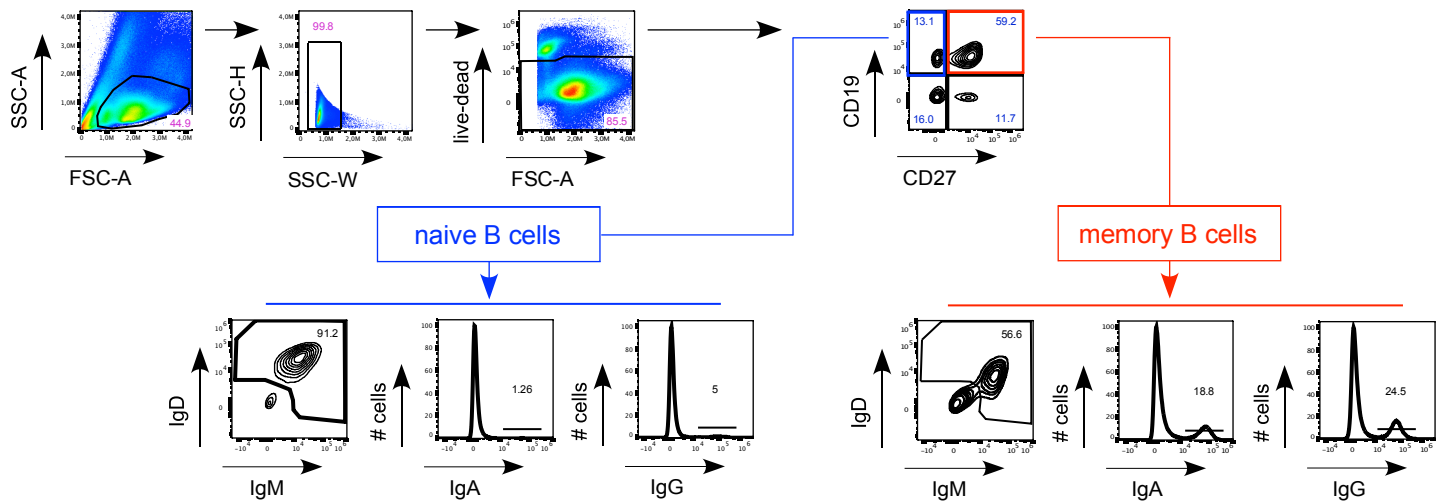

**B**

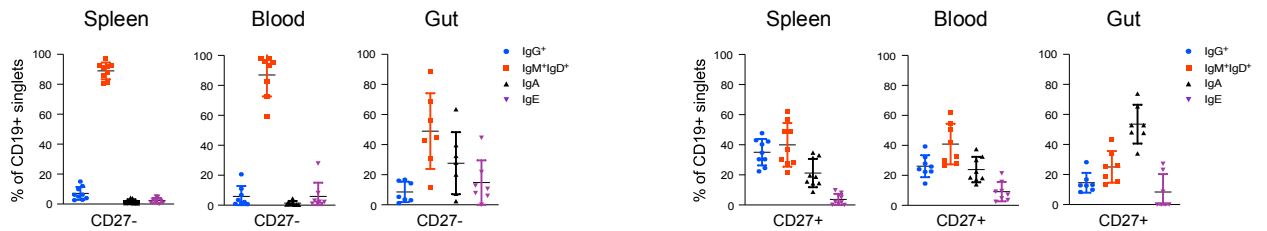

**Supplemental Figure 3: Flow cytometric analysis of isotype distribution among NBC and MBC within tissues.** (A) Gating strategy for flow cytometric detection of isotype distribution among splenic NBC (left, CD27<sup>-</sup>) and MBC (right, CD27<sup>+</sup>) of D215 using panel "Stain 4" (see supplemental table 2 & 3). Arrows indicate subsequent gating of populations and numbers next to outlined areas indicate percent gated populations. Analyzed were live singlets which are CD19<sup>+</sup>, CD27<sup>-</sup> NBC (blue) or CD27<sup>+</sup> MBC (red, top panel) and either IgM<sup>+</sup>IgD<sup>+</sup>, IgA<sup>+</sup> or IgG<sup>+</sup> (lower panel). (B) Surface immunoglobulin isotype distribution of indicated human organ donor samples of NBC (left) and MBC (right). "Inferred" IgE frequencies of MBC across tissues are plotted as difference from 100% using the sum of measured IgM/IgD, IgG and IgA frequencies.

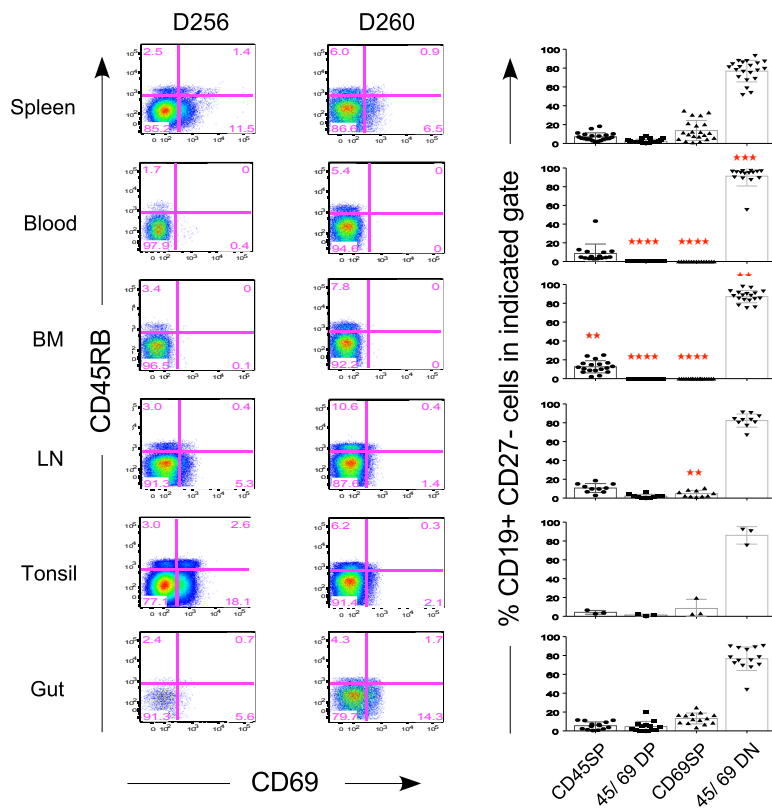

**Supplemental Figure 4: Subsets defined by CD45RB and CD69 for CD19<sup>+</sup> CD27<sup>-</sup> B cells of different human tissue samples.** Cryopreserved human cells of spleen, blood, bone marrow, lymph nodes, tonsil or intestinal tissue were thawed and stained as previously described. Results are a summary of flow panels "Stain 1 " and "Stain 2". Cells were acquired on a BD LSR II and live singlets were analyzed using FlowJo (Treestar). The left side of the graph shows the subsets defined by CD45RB and CD69 for CD19<sup>+</sup> CD27<sup>-</sup> (naive) B cells of the depicted tissues samples of D256 and D260 as dot plot diagrams. Numbers next to the outlined areas indicate the percent gated populations. The right side of the graph shows the percentages of CD19<sup>+</sup> CD27<sup>-</sup> cells in all four defined subsets (SP=single positive; DP=double positive; DN=double negative) discovered in different tissue samples. The results show the summary of 21 spleen, 15 blood, 18 bone marrow (BM), 10 lymph node (LN), 3 tonsil and 14 intestinal tissue (Gut) samples analyzed. Stars indicate significant differences of percentages found by using the unpaired two-tailed t-test for the CD45RB/ CD69 subsets in other tissue samples compared to the same subset in spleen (★★ p<0.005; ★★★ p<0.0005; ★★★★★ p<0.0001).

**A** Ileum - plasmablast  
 $p = 0.001$

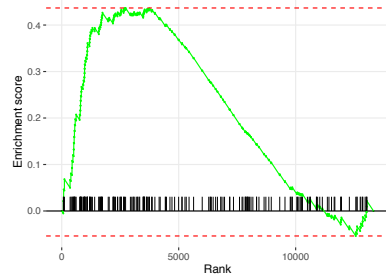

**B** Ileum - plasma cells  
 $p = 0.004$

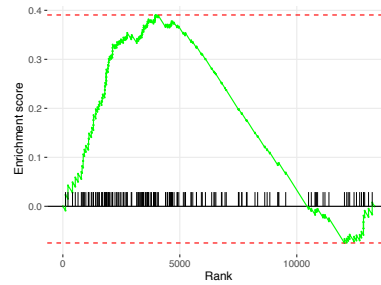

**C** Spleen - plasmablast  
 $p = 0.006$

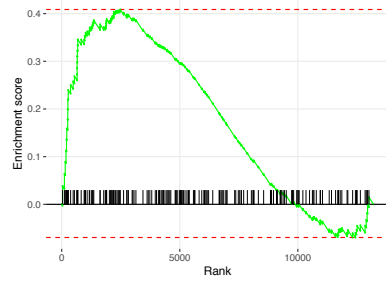

**D** Spleen - plasma cells  
 $p = 0.002$

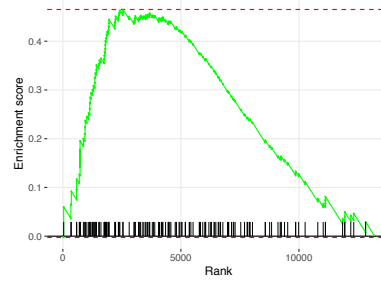

**Supplemental Figure 5: Gene set enrichment analysis (GSEA) of CD45RB/ CD69 subsets of spleen and gut.** RNA sequencing of naive and MBC subsets of cells as in Figure 6. GSEA plots illustrating significant upregulation of plasmablast (**A**) and plasma cell (**B**) gene signatures in ileum DP MBC vs. splenic DN naive B cells. GSEA plots as in A and B showing significant upregulation of plasmablast (**C**) and plasma cell (**D**) gene signatures in splenic DP MBC compared to splenic DN naive B cells. In each plot, the x-axis shows the genes ranked by log fold change between the populations described above, and the y-axis shows the running enrichment score on the signature gene set with nominal  $p$  value indicated for 1000 permutations.

**Supplemental Table 1.** List of donors used in this study.

| Donor ID | Age | Sex | Race     | Sample                                | Data             | 1 | 2 | 3 | 4 | 5 | 6 | S1 | S2 | S3 | S4 | S5 |
|----------|-----|-----|----------|---------------------------------------|------------------|---|---|---|---|---|---|----|----|----|----|----|
| 138      | 35  | M   | White    | Spleen                                | Flow             | X | X |   |   |   |   |    |    |    |    |    |
| 144      | 60  | M   | White    | Spleen                                | Flow             | X | X |   |   |   |   |    |    |    |    |    |
| 145      | 58  | M   | White    | Spleen                                | Flow             | X | X |   |   |   |   |    |    |    |    |    |
| 147      | 36  | F   | Black    | Spleen                                | Flow             | X | X |   |   |   |   |    |    |    |    |    |
| 149      | 55  | M   | White    | Spleen                                | Flow             | X | X |   |   |   |   |    |    |    |    |    |
| 153      | 46  | M   | Hispanic | Spleen                                | Flow             | X | X |   | X |   |   |    |    |    | X  |    |
| 154      | 54  | M   | Hispanic | Spleen                                | Flow             | X | X |   |   |   |   |    |    |    |    |    |
| 159      | 57  | F   | White    | Spleen, Blood, BM, Gut                | Flow             | X | X | X | X |   |   |    |    |    | X  |    |
| 160      | 55  | M   | Black    | Spleen, Blood, BM                     | Flow             | X | X |   |   |   |   |    |    |    |    |    |
| 163      | 53  | F   | Black    | Spleen                                | Flow             | X | X |   |   |   |   |    |    |    |    |    |
| 164      | 58  | F   | Black    | Spleen, Blood, BM, Gut                | Flow             | X | X | X | X |   |   |    |    |    | X  |    |
| 168      | 56  | F   | Hispanic | Spleen, Blood, BM                     | Flow             | X | X | X | X |   |   |    |    |    | X  |    |
| 169      | 33  | M   | White    | Spleen                                | Flow             | X | X |   | X |   |   |    |    |    | X  |    |
| 178      | 51  | M   | Black    | Blood, BM                             | Flow             |   | X |   |   |   |   |    |    |    |    |    |
| 181      | 46  | M   | Black    | Spleen, Blood, BM                     | Flow             | X | X | X | X |   |   |    |    |    | X  |    |
| 182      | 46  | M   | Hispanic | Spleen, Blood, BM, Gut                | Flow             | X | X | X | X |   |   |    |    |    | X  |    |
| 183      | 69  | F   | Black    | Spleen                                | Flow             | X | X |   |   |   |   |    |    |    |    |    |
| 185      | 57  | M   | White    | Spleen                                | Flow             | X | X |   | X |   |   |    |    |    | X  |    |
| 186      | 35  | M   | White    | Spleen, Blood, BM                     | Flow             | X | X | X | X |   |   |    |    | X  | X  |    |
| 193      | 50  | M   | Hispanic | Spleen, Blood, BM                     | Flow,<br>RNA-seq | X | X | X | X |   | X |    |    | X  | X  | X  |
| 197      | 70  | F   | Hispanic | Spleen, Blood, Lymph Node             | Flow             | X | X |   | X |   |   |    |    |    | X  |    |
| 205      | 45  | F   | Hispanic | Spleen, Blood, BM, Lymph Node         | Flow             | X | X | X | X |   |   |    |    | X  | X  |    |
| 215      | 45  | M   | Hispanic | Spleen, Blood, BM, Gut                | Flow             | X | X | X | X |   |   |    | X  | X  | X  |    |
| 217      | 49  | M   | Black    | Spleen, Blood, BM                     | Flow             | X | X |   | X |   |   |    |    |    | X  |    |
| 226      | 66  | F   | White    | Spleen, Blood, BM, Lymph Node,<br>Gut | Flow             | X | X |   | X |   |   |    |    | X  | X  |    |
| 228      | 69  | M   | White    | Spleen, Blood, BM, Lymph Node,<br>Gut | Flow             | X | X |   | X |   |   |    | X  |    | X  |    |

| Donor ID | Age | Sex | Race     | Sample                                     | Data          | 1 | 2 | 3 | 4 | 5 | 6 | S1 | S2 | S3 | S4 | S5 |
|----------|-----|-----|----------|--------------------------------------------|---------------|---|---|---|---|---|---|----|----|----|----|----|
| 230      | 52  | F   | Hispanic | Spleen, Blood, BM, Lymph Node, Gut         | Flow          | X | X |   | X |   |   | X  |    | X  | X  |    |
| 243      | 67  | F   | White    | Spleen, Blood, BM, Lymph Node              | Flow          | X | X | X | X |   |   |    |    |    | X  |    |
| 246      | 73  | M   | White    | Spleen, Blood, BM, Lymph Node              | Flow          | X | X | X | X |   |   |    |    | X  | X  |    |
| 256      | 70  | M   | Hispanic | Spleen, Blood, BM, Lymph Node, Gut, Tonsil | Flow, RNA-seq | X | X | X | X |   | X |    | X  | X  | X  | X  |
| 260      | 34  | M   | Hispanic | Spleen, Blood, BM, Lymph Node, Gut, Tonsil | Flow, RNA-seq | X | X | X | X |   | X |    | X  | X  | X  | X  |
| 269      | 61  | M   | White    | Spleen, Blood, BM                          | Flow, ELISpot | X | X | X | X | X |   |    |    |    | X  |    |
| 305      | 28  | F   | White    | Spleen, Gut                                | Flow, RNA-seq | X | X |   | X |   | X |    |    |    | X  | X  |
| 315      | 63  | M   | Hispanic | Spleen                                     | Flow, ELISpot | X | X |   | X | X |   |    |    |    | X  |    |
| 424      | 71  | F   | Black    | Spleen                                     | Flow, ELISpot |   |   |   |   | X |   |    |    |    |    |    |
| 443      | 47  | F   | Black    | Spleen                                     | Flow, ELISpot |   |   |   |   | X |   |    |    |    |    |    |
| 462      | 76  | F   | Asian    | Spleen                                     | Flow, ELISpot |   |   |   |   | X |   |    |    |    |    |    |
| 124      | 26  | M   | Black    | Gut                                        | Flow          | X | X |   | X |   |   |    |    |    | X  |    |
| 209      | 59  | M   | White    | Tonsil                                     | Flow          |   |   |   | X |   |   |    |    | X  | X  |    |
| 214      | 30  | M   | White    | Gut                                        | Flow          | X | X |   | X |   |   |    |    |    | X  |    |
| 219      | 50  | M   | Hispanic | Gut                                        | Flow          |   |   |   | X |   |   |    |    |    | X  |    |
| 221      | 29  | M   | Hispanic | Gut                                        | Flow          |   |   |   | X |   |   |    |    |    | X  |    |
| 290      | 77  | F   | Black    | Spleen, Blood, Gut                         | Flow          | X | X |   | X |   |   |    | X  | X  | X  |    |
| 300      | 56  | M   | Hispanic | Spleen, Blood, Gut                         | Flow          | X | X |   | X |   |   |    |    | X  | X  |    |
| 328      | 52  | M   | Hispanic | Gut                                        | Flow          | X | X |   |   |   |   |    |    |    |    |    |
| 357      | 18  | F   | Black    | Tonsil, Gut                                | Flow          | X | X |   |   |   |   | X  |    |    |    |    |
| 371      | 62  | M   | Black    | Gut                                        | Flow          | X | X |   |   |   |   |    |    |    |    |    |
| 192      | 78  | M   | White    | Spleen, Blood, Gut                         | Flow          |   |   |   |   |   |   |    | X  |    |    |    |
| 333      | 19  | M   | Unknown  | Spleen, Blood                              | Flow          |   |   |   |   |   |   |    | X  |    |    |    |

| Donor ID | Age | Sex | Race     | Sample             | Data | 1 | 2 | 3 | 4 | 5 | 6 | S1 | S2 | S3 | S4 | S5 |
|----------|-----|-----|----------|--------------------|------|---|---|---|---|---|---|----|----|----|----|----|
| 365      | 28  | F   | Hispanic | Spleen, Blood      | Flow |   |   |   |   |   |   |    | X  |    |    |    |
| 388      | 49  | M   | Asian    | Spleen, Blood, Gut | Flow |   |   |   |   |   |   |    | X  |    |    |    |

This table shows the donor samples used for the separate figures 1-6 and supplementary figures 1-5 with ID, age in years, sex, M = male, F = female, race and a list of the different samples analyzed. Behind that is depicted the data generated, flow, RNA-sequencing = RNA-seq or ELISpot.

**Supplemental Table 2.** Antibody staining cocktails for flow cytometry.

| <b>Stain 1</b>  | <b>Stain 2</b>   | <b>Stain 3</b>   | <b>Stain 4</b>   |
|-----------------|------------------|------------------|------------------|
| CD19-APC-Vio770 | CD19-APC-Vio770  | CD19-APC-Vio770  | CD19-APC-Vio770  |
| CD27-BV421      | CD27-BV421       | CD27-BV421       | CD27-BV421       |
| IgD-PE-Cy7      | IgD-PE-Cy7       | IgD-PE-Cy7       | IgD-PE-Cy7       |
| CD10-PE-Cy5     | IgM-PE-Cy5       | IgM-APC          | IgM-PE-Cy5       |
| CD38-BUV395     | CD21-PerCP-Cy5.5 | CD21-PerCP-Cy5.5 | CD21-PerCP-Cy5.5 |
| CD138-APC       | CD69-BV510       | CD69-BV510       | CD69-BV510       |
| CD95-FITC       | CD45RB-FITC      | CD45RB-FITC      | CD45RB-FITC      |
| IgM-PE          | IgA-PE           | IgA-PE           | IgA-PE           |
| IgG-bio         | IgG-bio          | IgG-bio          | IgG-bio          |
| + SA-BUV737     | + SA-BUV737      | + SA-BUV737      | + SA-BUV737      |
| FVS/ Ghost 510  | FVS 700          | FVS 700          | ZombieNIR        |

Listed are the antibodies used for the different flow cytometric staining panels.



**Supplemental Table 3.** List of antibodies used.

| Antibody                    | Company           | Catalog Number | Clone   |
|-----------------------------|-------------------|----------------|---------|
| CD19-APC-Vio770             | Miltenyi          | 130-096-643    | LT19    |
| CD27-BV421                  | BioLegend         | 302824         | O323    |
| IgD-PE-Cy7                  | BD Pharmingen     | 561314         | IA6-2   |
| IgM-PE-Cy5                  | BD Pharmingen     | 551079         | G20-127 |
| CD38-BUV395                 | BD Horizon        | 563811         | HB7     |
| CD21-PerCP-Cy5.5            | BioLegend         | 354908         | Bu32    |
| CD69-BV510                  | BioLegend         | 310936         | FN50    |
| CD45RB-FITC                 | Thermo Scientific | MA-1-19571     | MEM-55  |
| IgA-PE                      | Southern Biotech  | 2050-09        |         |
| IgG-bio                     | BD Pharmingen     | 555785         | G18-145 |
| Streptavidin-BUV737         | BD Horizon        | 564293         |         |
| CD10-PE-Cy5                 | BD Pharmingen     | 555376         | HI10a   |
| IgM-APC                     | BD Pharmingen     | 551062         | G20-127 |
| CD138-APC                   | BioLegend         | 352308         | DL-101  |
| CD95-FITC                   | BioLegend         | 305606         | DX2     |
| IgM-PE                      | BD Pharmingen     | 555783         | G20-127 |
| CD27-BUV737                 | BD Horizon        | 564301         | L128    |
| CD86-PE                     | BioLegend         | 305406         | IT2.2   |
| CD25-PE-Dazzle594           | BioLegend         | 356126         | M-A251  |
| anti-human-lambda           | Southern Biotech  | 2071-01        |         |
| anti-human-kappa            | Southern Biotech  | 2061-01        |         |
| anti-human-IgG-AP           | Sigma-Aldrich     | A3187          |         |
| anti-human-IgM-AP           | Sigma-Aldrich     | A3275          |         |
| Fixable Viability Stain 700 | BD Horizon        | 564997         |         |
| Fixable Viability Stain 510 | BD Horizon        | 564406         |         |
| Ghost Dye Violet 510        | Tonbo             | 13-0870        |         |
| ZombieNIR                   | BioLegend         | 423105         |         |

The table shows all used antibodies with fluorochrome, company name, catalog number and clone name.
